# Supplementary material
Source: MDPI journal article supplement (https://www.mdpi.com/2072-4292/12/13/2164)
Supplement: s1 [file s1]

## Maximizing Temporal Correlations in Long-Term Global Satellite Soil Moisture Data Merging

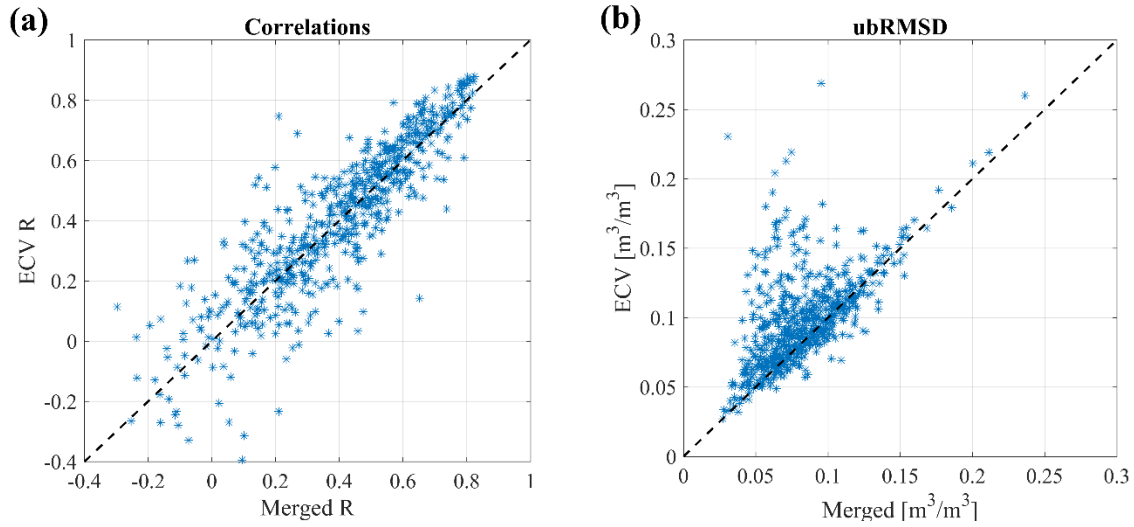

**Figure S1.** Comparisons of the (a) correlations and (b) ubRMSD of ECV and the merged product against the in situ measurements
